# Supplementary material for: Adaptation of A-to-I RNA editing in Drosophila
Source: PLOS journal article supplement (doi:10.1371/journal.pgen.1006648), 2017-03-10

# **A** All editing sites in *D. melanogaster*

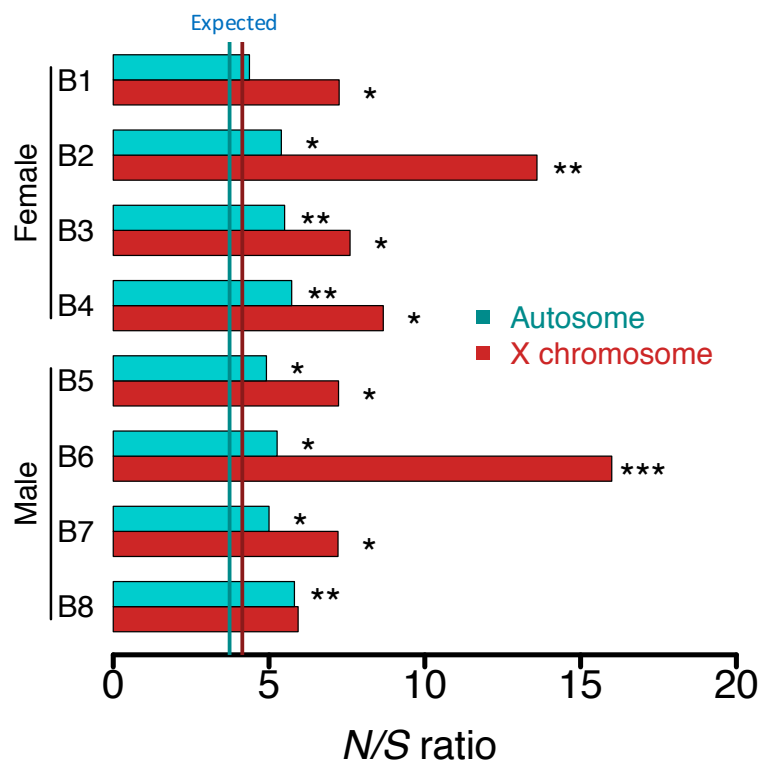

# **B** All sites with editing events conserved between *D. melanogaster* and *D. simulans*

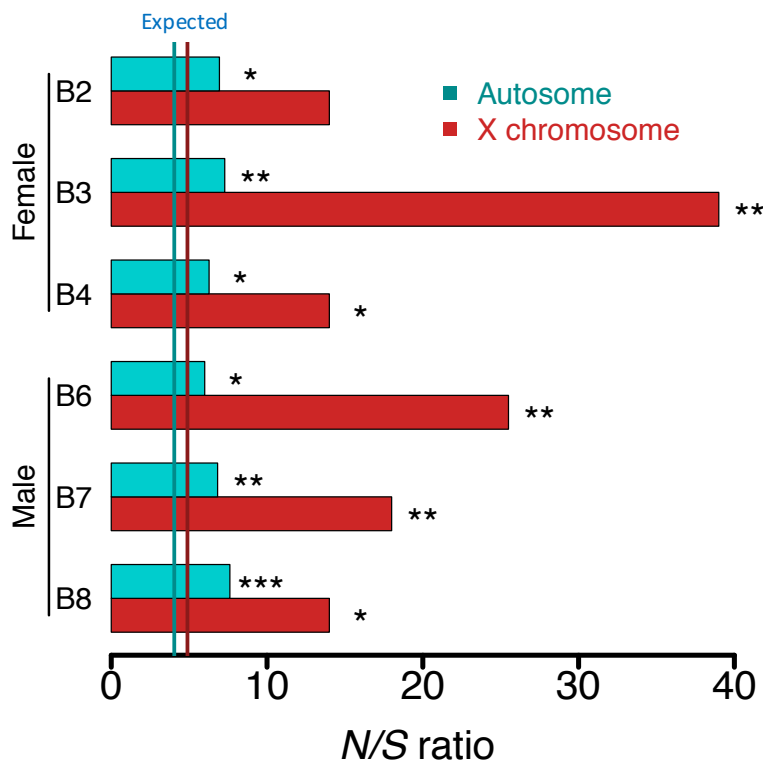

Supplement: S52 (10.1371/journal.pgen.1006648.s052) [file journal.pgen.1006648.s052]
